## Improving risk stratification of pulmonary hypertension patients

J.P. Dias Ferreira Reis<sup>1</sup>, M. Nogueira<sup>2</sup>, L. Branco<sup>1</sup>, L. Sousa<sup>1</sup>, A. Galrinho<sup>1</sup>, R. Cruz Ferreira<sup>1</sup><sup>1</sup>Hospital de Santa Marta, Lisbon, Portugal; <sup>2</sup>Cascais hospital, Cascais, Portugal**Funding Acknowledgement:** Type of funding sources: None.

**Background:** According to the 2016 ESC/ERS Guidelines on Pulmonary Hypertension (PH), the right atrial area (RAA) and the presence of pericardial effusion (PE) are the two main echocardiographic prognostic markers in PH patients (pts).

**Aim:** To assess the predictive ability of these two parameters.

**Methods:** Pts with PH were prospectively studied and several clinical/demographic/echocardiographic were retrieved as well as data from six-minute walk test (6MWT) and brain natriuretic peptide (BNP). All-cause mortality was analyzed by PE, RAA and other echocardiographic parameters for positive (PPV) and negative predictive value (NPV) to detect if the current guideline recommended cut-offs can precisely stratify risk in this setting. A survival analysis was performed to evaluate risk stratification (RS) provided by several different cut-offs.

**Results:** A total of 51 PH pts (mean age  $54 \pm 46$  years, 33.3% male, baseline BNP of  $342.4 \pm 439.9$  pg/mL, mean 6MWT distance of  $360.3 \pm 109.2$  meters and baseline pulmonary artery systolic pressure of  $78 \pm 26$  mmHg), of which 64.7% had Group I PH (GI) and 35.3% presented chronic throm-

boembolic pulmonary hypertension. There were no significant differences between these two groups, however pts in GI were significantly younger ( $p=0.001$ ), achieved a lower 6MWT distance ( $p=0.038$ ) and had worse values of right ventricular strain ( $p=0.040$ ). 27 pts (52.9%) died during a mean follow-up of 52 months, with no differences between groups ( $p=0.756$ ). The presence of a PE had a low NPV and PPV for the primary endpoint (45.0% and 45.5%, respectively), as well as the guideline recommended cut-offs for RAA ( $18\text{cm}^2$ : NPV- 50.0% and PPV- 55.2%;  $26\text{cm}^2$ : NPV- 51.3% and PPV- 66.7%). A Pulsed Doppler Tei index (TIp) cut-off of 0.40 had a higher NPV (70.8%) and PPV (74.1%). By Kaplan-Meier analysis, neither the presence of PE (log rank  $p=0.508$ ) nor the recommended RAA cut-offs provided accurate risk discrimination (log rank  $p>0.05$  for all). Pts below a TIp cut-off of 0.40 presented a significantly lower survival during follow-up (log rank  $p=0.002$ ).

**Conclusion:** The currently recommended echocardiographic prognostic markers cannot precisely discriminate risk in PH pts. Markers of Right Ventricular Dysfunction may improve RS in this population.

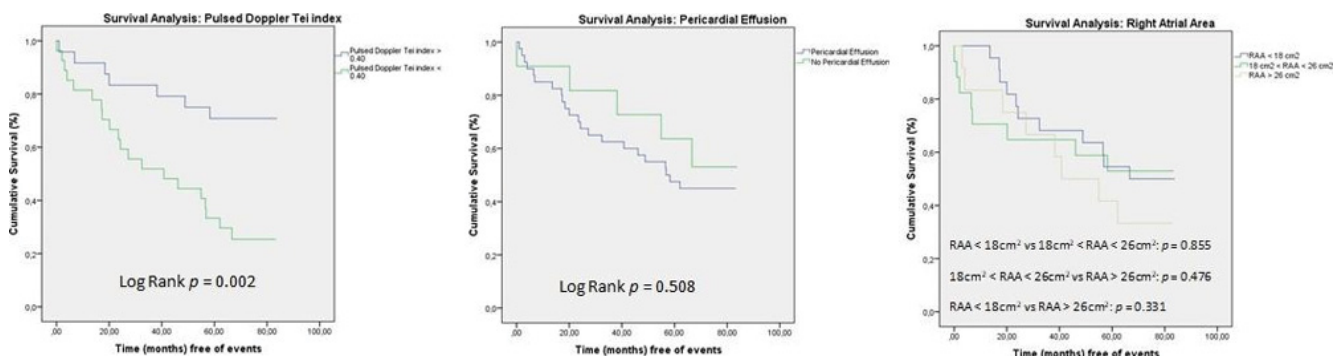

Source: http://academic.oup.com/eurheartj/article-pdf/42/Supplement_1/ehab724.1896/40596773/ehab724.1896.pdf
